# Supplementary material for: Computational mechanisms underlying cortical responses to the affordance properties of visual scenes
Source: PubMed Central journal article supplement (PMC5933806; doi:10.1371/journal.pcbi.1006111), 2018-04-23

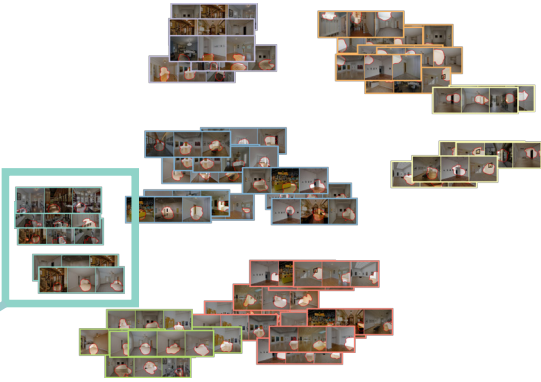

Cluster 1

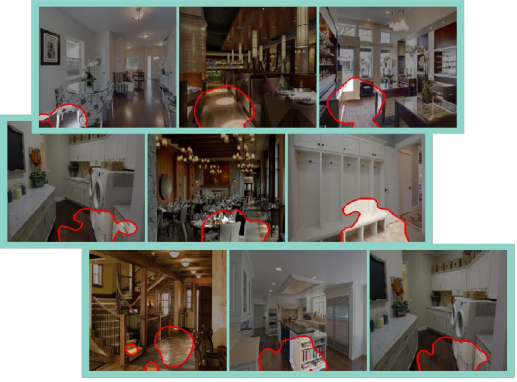

©

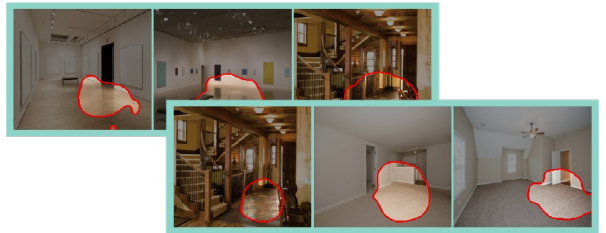

Supplement: pcbi.1006111.s001.pdf [file pcbi.1006111.s001.pdf]
